# Supplementary material
Source: PubMed Central journal article supplement (PMC2785379)
Supplement: supp_M109.028431_jbc.M109.028431-1.pdf [file supp_M109.028431_jbc.M109.028431-1.pdf]

# SUPPLEMENTAL DATA

Supplementary Figure 1. Stollar et al

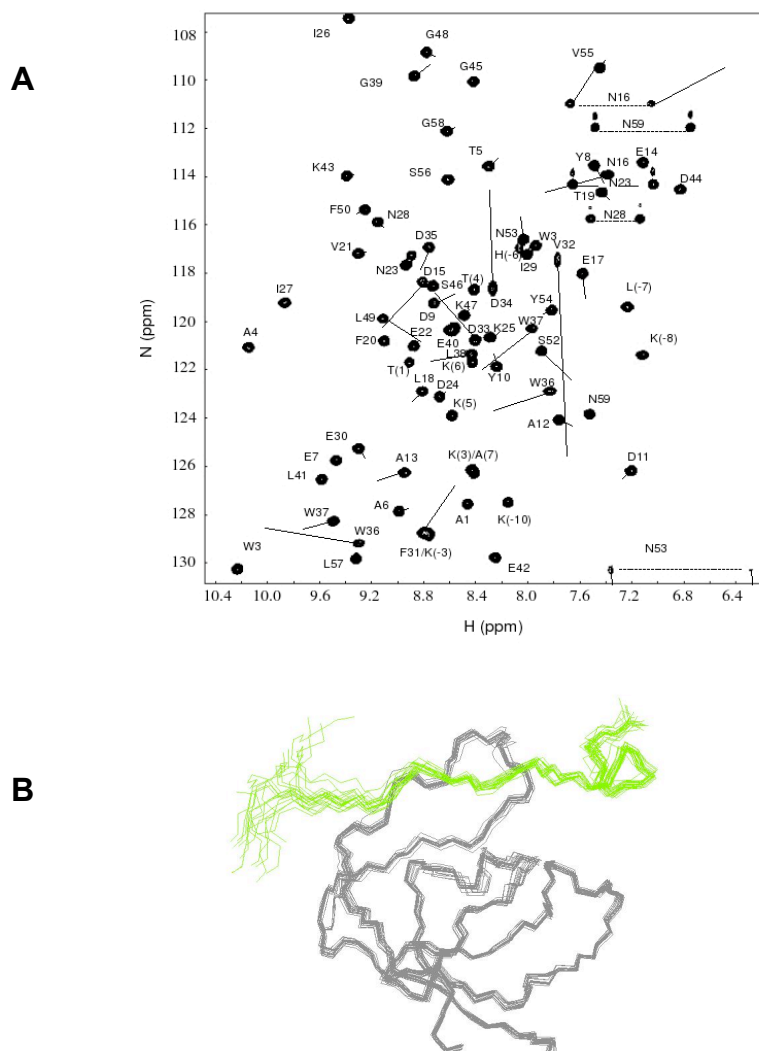

**(A)** The  $^1\text{H}$ - $^{15}\text{N}$  HSQC of the AbpSH3:ArkA complex. The end of the solid line indicates the position of the peak in the unbound state. The dashed lines indicate pairs of sidechain amide protons. **(B)** Superimposition of 20 lowest energy structures of the AbpSH3-ArkA complex. The SH3 domain is in silver with the peptide in green.

## Supplementary Figure 2. Stollar et al

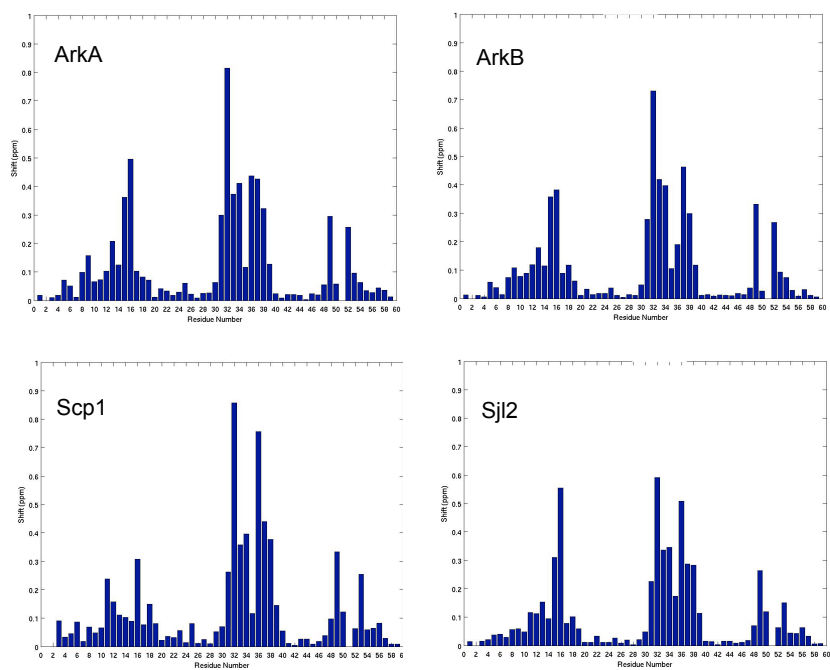

Chemical shift differences between unbound and peptide bound AbpSH3 complexes.

## Supplementary table 1. Stollar et al

### NOEs

|                              |      |
|------------------------------|------|
| Intermolecular NOEs          | 248  |
| Intramolecular NOEs (AbpSH3) | 1930 |
| Intramolecular NOEs (ArkA)   | 317  |

### Dipolar coupling restraints (Q factor)

|       |                   |
|-------|-------------------|
| HN-N  | 67 (0.15 ± 0.013) |
| CA-CB | 62 (0.16 ± 0.013) |
| CA-HA | 53 (0.14 ± 0.010) |
| CA-CO | 66 (0.24 ± 0.017) |
| N-CO  | 60 (0.30 ± 0.022) |

### RMSD from ideal distances (Å)

|       |                 |
|-------|-----------------|
| Bonds | 0.0038 ± 0.0002 |
| NOEs  | 0.0280 ± 0.0050 |

### RMSD from ideal angles (degrees)

|                 |              |
|-----------------|--------------|
| Bond angles (°) | 0.59 ± 0.013 |
| Improper (°)    | 0.57 ± 0.036 |

### RMSD from mean structure (Å)

|                             | <u>Backbone</u> | <u>Heavy Atoms</u> |
|-----------------------------|-----------------|--------------------|
| AbpSH3 (1 to 59)            | 0.30 ± 0.1      | 0.90 ± 0.1         |
| Ark1 (3 to -10)             | 0.41 ± 0.3      | 1.41 ± 0.5         |
| Complex (1 to 59, 3 to -10) | 0.37 ± 0.2      | 1.05 ± 0.2         |

### Procheck ramachandran analysis for complex (1 to 59, 3 to -10)

|                                        |       |
|----------------------------------------|-------|
| Residues in most favored regions       | 77.9% |
| Residues in additional allowed regions | 17.9% |
| Residues in generously allowed regions | 2.2%* |
| Residues in disallowed regions         | 1.9%* |

\* D15 is the major residue in the disallowed region. CPMG relaxation-dispersion experiments in the bound complex revealed the presence of millisecond to microsecond timescale exchange with a minor state for the D15 amide only (data not shown), suggesting that NOEs arising from these two states are constraining this position.

## Supplementary Table 2. Stollar et al

| Strain              | Genotype                                                    | Source                                        |
|---------------------|-------------------------------------------------------------|-----------------------------------------------|
| BY263 <sup>a</sup>  | MATa trp1Δ63 ura3-52 lys2-801<br>ade2-107 his3Δ200 leu2-Δ1  | Measday et al (1994)<br>Science 266:1391-5.   |
| BY4741 <sup>b</sup> | MATa ura3Δ0 leu2Δ0 his3Δ1<br>met15Δ0                        | Brachmann et al (1998)<br>Yeast 14:115-32.    |
| <i>ark1Δ::kan</i>   | BY4741 <i>ark1Δ::kan</i>                                    | Deletion consortium                           |
| BY4075 <sup>b</sup> | MATa ura3 leu2 his3 ark1-Δ608-626-<br>3xMyc::Hph prk1Δ::kan | Haynes et al (2007)<br>Genetics 176: 193-208. |

<sup>a</sup> S288C derivative.

<sup>b</sup> Strains from the deletion consortium are isogenic to the parent strain, BY4741, also an S288C derivative.

### Supplementary Table 3. Stollar et al

| Plasmid      | Description                                                                                                                                            |
|--------------|--------------------------------------------------------------------------------------------------------------------------------------------------------|
| pARK1 WT     | Contains a 2.8-kb fragment including 0.9-kb promoter region, and the 1.9-kb <i>ARK1</i> coding sequence (codons 1-638), fused to the N terminus of GFP |
| pΔArkB       | pARK1 WT derivative containing <i>ARK1</i> with the 622-629 amino acid deletion                                                                        |
| pArkA_P(2)A  | pARK1 WT derivative containing <i>ARK1</i> with the P <sub>609</sub> A substitution and 622-629 amino acid deletion                                    |
| pArkA_P(2)V  | pARK1 WT derivative containing <i>ARK1</i> with the P <sub>609</sub> V substitution and 622-629 amino acid deletion                                    |
| pArkA_P(0)A  | pARK1 WT derivative containing <i>ARK1</i> with the P <sub>611</sub> A substitution and 622-629 amino acid deletion                                    |
| pArkA_P(-1)A | pARK1 WT derivative containing <i>ARK1</i> with the P <sub>612</sub> A substitution and 622-629 amino acid deletion                                    |
| pArkA_K(-3)A | pARK1 WT derivative containing <i>ARK1</i> with the K <sub>614</sub> A substitution and 622-629 amino acid deletion                                    |
| pArkA_K(-3)R | pARK1 WT derivative containing <i>ARK1</i> with the K <sub>614</sub> R substitution and 622-629 amino acid deletion                                    |
| pArkA_H(-6)A | pARK1 WT derivative containing <i>ARK1</i> with the H <sub>617</sub> A substitution and 622-629 amino acid deletion                                    |
| pArkA_L(-7)A | pARK1 WT derivative containing <i>ARK1</i> with the L <sub>618</sub> A substitution and 622-629 amino acid deletion                                    |
| pArkB        | pARK1 WT derivative containing <i>ARK1</i> with the 605-615 amino acid deletion                                                                        |
| pPrk         | pARK1 WT derivative containing <i>ARK1</i> with the 605-629 amino acid replacement for residues 746-762 from Prk1p                                     |
| pScp         | pARK1 WT derivative containing <i>ARK1</i> with the 605-629 amino acid replacement for residues 154-170 from Scp1p                                     |
| pSrv         | pARK1 WT derivative containing <i>ARK1</i> with the 605-629 amino acid replacement for residues 350-367 from Srv2p                                     |
| pSjl         | pARK1 WT derivative containing <i>ARK1</i> with the 605-629 amino acid replacement for residues 1111-1127 from Sjl2p                                   |
